# Supplementary material
Source: publisher site journal article supplement (https://oneecosystem.pensoft.net/article/download/suppl/7675797/)
Supplement: Supplementary file 1

**Appendix 4. The final set of indicators developed for the mapping and assessment of ecosystem condition in the Hungarian MAES for the major ecosystem types (ET), along with their SEEA-ECT condition type (Czucz et al. 2021).**

| Indicator                                                                 | Ecosystem type |              |                         |         |              |       | SEEA-Ecosystem condition type |                                     |
|---------------------------------------------------------------------------|----------------|--------------|-------------------------|---------|--------------|-------|-------------------------------|-------------------------------------|
|                                                                           | Urban          | Agricultural | Grasslands              | Forests | Wetlands     | Water |                               |                                     |
| Biodiversity indicators                                                   |                |              |                         |         |              |       |                               |                                     |
| Ratio of present bird species compared to the expected (%)*               |                | (x)          | x                       | x       | x            | (x)   | B1                            | Compositional state characteristics |
| WFD biological components                                                 |                |              |                         |         |              | x     | B1                            | Compositional state characteristics |
| Anthropogenic transformation of the vegetation                            |                |              |                         |         |              |       |                               |                                     |
| Departure of the current vegetation from the Potential Natural Vegetation |                |              | x                       |         | x            |       |                               | Natural resource management         |
| Soil characteristics                                                      |                |              |                         |         |              |       |                               |                                     |
| Soil fertility                                                            | x              | x            | x                       | x       | x            |       |                               | Pre-aggregated indicators           |
| Landscape-level indicators                                                |                |              |                         |         |              |       |                               |                                     |
| Number of ecosystem types (1 km radius)                                   | x              | x            | x                       | x       | x            | x     | C1                            | Landscape characteristics           |
| (Shannon) diversity of ecosystem types (1 km radius)                      | x              | x            | x                       | x       | x            | x     | C1                            | Landscape characteristics           |
| Land take (based on Corine Land Cover time series) 2000-2018              |                | x            |                         |         |              |       |                               | Pressures                           |
| Loss of grasslands                                                        |                |              | x                       |         |              |       |                               | Pressures                           |
| Forest area changes                                                       |                |              |                         | x       |              |       |                               | Pressures                           |
| Proportion of Natura 2000 areas in the different ecosystem types          | x              | x            | x                       | x       | x            | x     |                               | Protected areas                     |
| Ecosystem-type specific indicators                                        |                |              |                         |         |              |       |                               |                                     |
| Proportion of seminatural areas                                           |                | 300 m radius | 300, 500, 1000 m radius |         | 220 m radius |       | C1                            | Landscape characteristics           |
| Average parcel size                                                       |                | x            |                         |         |              |       | C1                            | Landscape characteristics           |
| Number of cultivated plants (no or no/ha)                                 |                | x            |                         |         |              |       | B1                            | Compositional state characteristics |

| Indicator                                                                      | Ecosystem type |              |            |         |          |       | SEEA-Ecosystem condition type |                                     |
|--------------------------------------------------------------------------------|----------------|--------------|------------|---------|----------|-------|-------------------------------|-------------------------------------|
|                                                                                | Urban          | Agricultural | Grasslands | Forests | Wetlands | Water |                               |                                     |
| Ecosystem-type specific indicators                                             |                |              |            |         |          |       |                               |                                     |
| Areal proportion of alfalfa and green fallow                                   |                | x            |            |         |          |       | C1                            | Landscape characteristics           |
| Areal proportion of alfalfa and green fallow                                   |                | x            |            |         |          |       | C1                            | Landscape characteristics           |
| Proportion of fallow land                                                      |                | x            |            |         |          |       | C1                            | Landscape characteristics           |
| Proportion of maize                                                            |                | x            |            |         |          |       | C1                            | Landscape characteristics           |
| Proportion of protected areas (AES or HVNA)                                    |                | x            | x          |         |          |       |                               | Protected areas                     |
| Proportion of seminatural grasslands (300, 500, 1000 m radius)                 |                |              | x          |         |          |       |                               | Ecosystem extent                    |
| Distance to (any) roads                                                        |                |              | x          |         |          |       |                               | Pressures                           |
| Distance to major roads                                                        |                |              | x          |         |          |       |                               | Pressures                           |
| Distance to surface water                                                      |                |              | x          |         |          |       | A1                            | Physical state characteristics      |
| Distance to canals                                                             |                |              | x          |         |          |       | A1                            | Physical state characteristics      |
| Frequency of water cover (Water and Wetness Probability Index)                 |                |              | x          |         | x        |       | A1                            | Physical state characteristics      |
| Proportion of wetlands (220 m radius)                                          |                |              |            |         | x        |       |                               | Ecosystem extent                    |
| Presence of surface water and temporary surface water (220 m radius)           |                |              |            |         | x        |       | A1                            | Physical state characteristics      |
| Presence of roads (within the 20 m cell)                                       |                |              |            |         | x        |       |                               | Pressures                           |
| Heterogeneity of wetland types                                                 |                |              |            |         | x        |       | B1                            | Compositional state characteristics |
| Number of native tree species                                                  |                |              |            | x       |          |       | B1                            | Compositional state characteristics |
| The proportion of native tree species in the upper and lower canopy layers (%) |                |              |            | x       |          |       | B1                            | Compositional state characteristics |
|                                                                                | Ecosystem type |              |            |         |          |       |                               |                                     |

| Indicator                                                                                                | Urban | Agricultural | Grasslands | Forests | Wetlands | Water | SEEA-Ecosystem condition type |                                     |
|----------------------------------------------------------------------------------------------------------|-------|--------------|------------|---------|----------|-------|-------------------------------|-------------------------------------|
| Ecosystem-type specific indicators                                                                       |       |              |            |         |          |       |                               |                                     |
| Number of native admixing tree species                                                                   |       |              |            | x       |          |       | B1                            | Compositional state characteristics |
| Presence of the main tree species characteristic of the specific habitat type in the expected proportion |       |              |            | x       |          |       | B1                            | Compositional state characteristics |
| The proportion of the native mixing tree species compared to that expected in the specific habitat type  |       |              |            | x       |          |       | B1                            | Compositional state characteristics |
| The proportion of non-native tree species in the upper and lower canopy layers (%)                       |       |              |            | x       |          |       | B1                            | Compositional state characteristics |
| The proportion of invasive tree species in the upper and lower canopy layers (%)                         |       |              |            | x       |          |       | B1                            | Compositional state characteristics |
| Number of age cohorts                                                                                    |       |              |            | x       |          |       | B2                            | Structural state characteristics    |
| Difference between the lowest and highest cohort age (years)                                             |       |              |            | x       |          |       | B2                            | Structural state characteristics    |
| Presence of old (>=100 years or 60 in the case of native softwood forests) trees                         |       |              |            | x       |          |       | B2                            | Structural state characteristics    |
| Number of (10-cm) dbh-classes                                                                            |       |              |            | x       |          |       | B2                            | Structural state characteristics    |
| (Shannon) diversity of (10-cm) dbh-classes – considered only if number of (10-cm) dbh classes >2         |       |              |            | x       |          |       | B2                            | Structural state characteristics    |
| Presence of large (dbh>50) trees                                                                         |       |              |            | x       |          |       | B2                            | Structural state characteristics    |
| Presence and type of the shrub layer                                                                     |       |              |            | x       |          |       | B2                            | Structural state characteristics    |
| Proportion of urban green areas (trees) within the settlement                                            | x     |              |            |         |          |       | C1                            | Landscape characteristics           |
| Proportion of urban green areas (non-tree) within the settlement                                         | x     |              |            |         |          |       | C1                            | Landscape characteristics           |

| Indicator                                             | Ecosystem type |              |            |         |          |       | SEEA-Ecosystem condition type |                           |
|-------------------------------------------------------|----------------|--------------|------------|---------|----------|-------|-------------------------------|---------------------------|
|                                                       | Urban          | Agricultural | Grasslands | Forests | Wetlands | Water |                               |                           |
| Ecosystem-type specific indicators                    |                |              |            |         |          |       |                               |                           |
| Proportion of urban green areas within the settlement | x              |              |            |         |          |       | C1                            | Landscape characteristics |

Czúcz, B., Keith, H., Driver, A., Jackson, B., Nicholson, E., Maes, J., 2021. A common typology for ecosystem characteristics and ecosystem condition variables. *One Ecosystem* 6, e58218.  
<https://doi.org/10.3897/oneeco.6.e58218>
